# Supplementary material for: Allelic variants of OsHKT1;1 underlie the divergence between indica and japonica subspecies of rice (Oryza sativa) for root sodium content
Source: PLoS Genet. 2017 Jun 5;13(6):e1006823. doi: 10.1371/journal.pgen.1006823 (PMC5476289; doi:10.1371/journal.pgen.1006823)
Supplement: S9 Table — (XLSX) [file pgen.1006823.s024.xlsx]

## Sheet: Sheet1
Gene	Direction	Primer Sequence	Purpose
LOC_Os01g51380	F	TGTTATGAATTCTATTGCCCGTGG	SNP Confirmation
LOC_Os01g51380	R	TGCTGTGGTGAGAGCAATTCT	SNP Confirmation
LOC_Os01g51420	F	ATGGACTCCTCCCGCTCCT	SNP Confirmation
LOC_Os01g51420	R	GAGCAGCTGATCTTCTTGTAGAG	SNP Confirmation
LOC_Os04g51820	F	ATGCATCCACCAAGTTTAG	SNP Confirmation
LOC_Os04g51820	R	CATTACTTGCAGTAGAATCAG	SNP Confirmation
LOC_Os04g51830	F	TGAACGCGCTGTTCCTCGC	Real-time qPCR
LOC_Os04g51830	R	CCATATGCACTGACAACTTCGA	Real-time qPCR
LOC_Os04g51820	F	TAGCCTACATTGCCGAAAGC	Real-time qPCR
LOC_Os04g51820	R	ACAAGACAAGCCGGTGAATC	Real-time qPCR
LOC_Os04g02820	F	ATTTGGTGCTTTGGACCTGA	Real-time qPCR (Internal Control)
LOC_Os04g02820	R	TGAATAGCATCAGCGTGGAG	Real-time qPCR (Internal Control)
LOC_Os04g51830	F	TGAACGCGCTGTTCCTCGC	Real-time qPCR
LOC_Os04g51830	R	CCATATGCACTGACAACTTCGA	Real-time qPCR
LOC_Os04g51820	F	AAAAAGCAGGCTGAGTATGCTTACATCCTTC	HKT1;1 RNAi
LOC_Os04g51820	R	AGAAAGCTGGGTCATTACTTGCAGTAGAATCAG	HKT1;1 RNAi
LOC_Os04g51830	F	caccACCGTCCTGATGCTCC	HKT1;4 RNAi
LOC_Os04g51830	R	GATCTGTCCATGGCGTCGC	HKT1;4 RNAi
LOC_Os04g51820	F	GGGGACAAGTTTGTACAAAAAAGCAGGCTCAGTTTAAAACCGCTGTGGAA	HKT1;1 native overexpression
LOC_Os04g51820	R	GGGGACCACTTTGTACAAGAAAGCTGGGTTCATTTCAGGATGAACTCCTT	HKT1;1 native overexpression
LOC_Os04g51820	F	CCATATGCACTGACAACTTCGA	Oocyte expression
LOC_Os04g51820	R	ACTAGTTCATTTCAGGATGAACTCC	Oocyte expression
